# Supplementary material for: Impact of Enforcement of the Act to Improve Training Conditions and the Status of Medical Residents in Emergency Abdominal Surgery
Source: PubMed Central journal article supplement — Yonsei Med J. 2022 Jul 19;63(8):751–8. doi: 10.3349/ymj.2022.63.8.751 (PMC9344275; doi:10.3349/ymj.2022.63.8.751), 2022-07-19
Supplement: ymj-63-751-s001.pdf [file ymj-63-751-s001.pdf]

**Supplementary Table 1.** Comparison of the Characteristics of Survivors and Non-Survivors

|                                          | <b>Survivor<br/>(n=2519)</b> | <b>Non-survivor<br/>(n=52)</b> | <b>p value</b> |
|------------------------------------------|------------------------------|--------------------------------|----------------|
| Age (yr)                                 | 47.0 (33.0–59.0)             | 75.5 (62.0–83.7)               | <0.001         |
| Sex (male)                               | 1239 (49.2)                  | 26 (50.0)                      | >0.999         |
| Laboratory test                          |                              |                                |                |
| Hemoglobin <10 (g/dL)                    | 58 (2.3)                     | 13 (25.0)                      | <0.001         |
| Abnormal WBC count (10 <sup>3</sup> /uL) | 1758 (70.2)                  | 33 (63.5)                      | 0.297          |
| Neutrophil count >80 (%)                 | 1142 (45.6)                  | 31 (59.6)                      | 0.044          |
| C-reactive protein >1.0 (mg/dL)          | 1528 (61.7)                  | 43 (82.7)                      | 0.002          |
| Blood urea nitrogen >20 (mg/dL)          | 248 (10.0)                   | 27 (51.9)                      | <0.001         |
| Creatinine >1.0 (mg/dL)                  | 348 (14.0)                   | 30 (57.7)                      | <0.001         |
| Albumin <3.0 (g/dL)                      | 76 (3.3)                     | 24 (46.2)                      | <0.001         |
| Total bilirubin >2.0 (mg/dL)             | 156 (6.3)                    | 3 (5.8)                        | 0.884          |
| Vital sign                               |                              |                                |                |
| SBP <90 (mm Hg)                          | 34 (1.3)                     | 7 (13.5)                       | <0.001         |
| Pulse rate >100 (bpm)                    | 296 (11.5)                   | 21 (40.4)                      | <0.001         |
| Body temperature >37.8 (°C)              | 416 (16.5)                   | 8 (15.4)                       | 0.828          |
| Diagnosis                                |                              |                                | <0.001         |
| Appendicitis                             | 2112 (83.8)                  | 12 (23.1)                      |                |
| Cholecystitis                            | 192 (7.6)                    | 1 (1.9)                        |                |
| Major emergency surgery                  | 215 (8.6)                    | 39 (75.0)                      |                |
| Number of residents on 24-hr shift       |                              |                                | 0.697          |
| 1                                        | 482 (19.1)                   | 10 (19.2)                      |                |
| 2                                        | 1744 (69.2)                  | 34 (65.4)                      |                |
| 3                                        | 293 (11.6)                   | 8 (15.4)                       |                |
| Time from ER arrival to surgery (min)    | 438.0 (331.0–638.0)          | 452.5 (340.5–605.5)            | 0.948          |
| Length of hospital stay (day)            | 4 (4–6)                      | 16.5 (9.25–27.0)               | <0.001         |
| SLRW implementation                      | 1100 (43.7)                  | 18 (34.6)                      | 0.192          |

SLRW, special law on restriction of working hours in training; ER, emergency room; SBP, systolic blood pressure.

Data are presented as interquartile range or n (%).
