# Supplementary material for: Impact of Enforcement of the Act to Improve Training Conditions and the Status of Medical Residents in Emergency Abdominal Surgery
Source: PubMed Central journal article supplement — Yonsei Med J. 2022 Jul 19;63(8):751–8. doi: 10.3349/ymj.2022.63.8.751 (PMC9344275; doi:10.3349/ymj.2022.63.8.751), 2022-07-19
Supplement: ymj-63-751-s002.pdf [file ymj-63-751-s002.pdf]

**Supplementary Table 2.** Subgroup Analysis of Patients with Appendicitis

|                                       | <b>Pre-SLRW<br/>(n=1238)</b> | <b>Post-SLRW<br/>(n=886)</b> | <b><i>p</i> value</b> |
|---------------------------------------|------------------------------|------------------------------|-----------------------|
| Age (yr)                              | 44 (31–55)                   | 46 (31–58)                   | <0.001                |
| Sex (male)                            | 599 (48.4)                   | 427 (48.2)                   | 0.965                 |
| Laboratory test                       |                              |                              |                       |
| Hemoglobin <10 (g/dL)                 | 18 (1.5)                     | 14 (1.6)                     | 0.857                 |
| Abnormal WBC ( $10^3/\mu\text{L}$ )   | 904 (73.3)                   | 604 (68.9)                   | 0.028                 |
| Neutrophil count >80 (%)              | 548 (44.4)                   | 397 (45.3)                   | 0.696                 |
| C-reactive protein >1.0 (mg/dL)       | 753 (61.6)                   | 564 (64.8)                   | 0.134                 |
| Blood urea nitrogen >20 (mg/dL)       | 72 (5.9)                     | 66 (7.6)                     | 0.119                 |
| Creatinine >1.0 (mg/dL)               | 146 (11.9)                   | 102 (11.7)                   | 0.898                 |
| Albumin <3.0 (g/dL)                   | 17 (1.4)                     | 9 (1.2)                      | 0.720                 |
| Total bilirubin >2.0 (mg/dL)          | 91 (7.4)                     | 33 (3.8)                     | 0.001                 |
| Vital sign                            |                              |                              |                       |
| SBP <90 (mm Hg)                       | 14 (1.1)                     | 7 (0.8)                      | 0.434                 |
| Pulse rate >100 bpm                   | 122 (9.9)                    | 101 (11.4)                   | 0.252                 |
| Body temperature >37.8 (°C)           | 204 (16.5)                   | 153 (17.3)                   | 0.631                 |
| Time from ER arrival to surgery (min) | 423.5 (330.5–598.5)          | 435.0 (331.0–636.5)          | 0.169                 |
| Length of hospital stay (day)         | 4 (4–5)                      | 4 (3–5)                      | 0.316                 |
| Mortality                             | 9 (0.7)                      | 3 (0.3)                      | 0.239                 |

SLRW, special law on restriction of working hours in training; ER, emergency room; SBP, systolic blood pressure.

Data are presented as interquartile range or n (%).
