# Supplementary material for: Impact of Enforcement of the Act to Improve Training Conditions and the Status of Medical Residents in Emergency Abdominal Surgery
Source: PubMed Central journal article supplement — Yonsei Med J. 2022 Jul 19;63(8):751–8. doi: 10.3349/ymj.2022.63.8.751 (PMC9344275; doi:10.3349/ymj.2022.63.8.751), 2022-07-19
Supplement: ymj-63-751-s003.pdf [file ymj-63-751-s003.pdf]

**Supplementary Table 3.** Subgroup Analysis of Patients with Cholecystitis

|                                       | <b>Pre-SLRW<br/>(n=65)</b> | <b>Post-SLRW<br/>(n=128)</b> | <b><i>p</i> value</b> |
|---------------------------------------|----------------------------|------------------------------|-----------------------|
| Age (yr)                              | 52.6±12.8                  | 57.7±15.4                    | 0.016                 |
| Sex (male)                            | 35 (53.8)                  | 73 (57.0)                    | 0.674                 |
| Laboratory test                       |                            |                              |                       |
| Hemoglobin <10 (g/dL)                 | 0 (0.0)                    | 1 (0.8)                      | 0.475                 |
| Abnormal WBC (10 <sup>3</sup> /uL)    | 35 (53.8)                  | 88 (68.8)                    | 0.042                 |
| Neutrophil count >80 (%)              | 24 (36.9)                  | 56 (43.8)                    | 0.363                 |
| C-reactive protein >1.0 (mg/dL)       | 28 (45.9)                  | 79 (62.7)                    | 0.030                 |
| Blood urea nitrogen >20 (mg/dL)       | 5 (8.1)                    | 26 (21.1)                    | 0.025                 |
| Creatinine >1.0 (mg/dL)               | 9 (14.5)                   | 21 (17.2)                    | 0.640                 |
| Albumin <3.0 (g/dL)                   | 1 (1.6)                    | 3 (2.9)                      | 0.605                 |
| Total bilirubin >2.0 (mg/dL)          | 8 (12.3)                   | 9 (7.0)                      | 0.222                 |
| Vital sign                            |                            |                              |                       |
| SBP <90 (mm Hg)                       | 1 (1.5)                    | 0 (0.0)                      | 0.159                 |
| Pulse rate >100 bpm                   | 2 (3.1)                    | 16 (12.5)                    | 0.033                 |
| Body temperature >37.8 (°C)           | 8 (12.3)                   | 24 (18.8)                    | 0.255                 |
| Time from ER arrival to surgery (min) | 717.4±311.8                | 681.1±339.6                  | 0.471                 |
| Length of hospital stay (day)         | 4.5±2.2                    | 4.6±2.0                      | 0.802                 |
| Mortality                             | 1 (1.5)                    | 0 (0.0)                      | 0.159                 |

SLRW, special law on restriction of working hours in training; ER, emergency room; SBP, systolic blood pressure.

Data are presented as interquartile range or n (%).
